# Supplementary material for: Gelation and the Self-Healing Behavior of the Chitosan–Catechol Hydrogel
Source: MDPI journal article supplement (doi:10.3390/polym14214614), 2022-10-30
Supplement: s1 [file s1]

## Supplementary Material: Gelation and Self-Healing Behavior of Chitosan-Catechol Hydrogel

Yu-Ting Lan, Qian-Pu Cheng, Junpeng Xu, Shih-Ho Lin, Jhih-Min Lin, Shan-hui Hsu

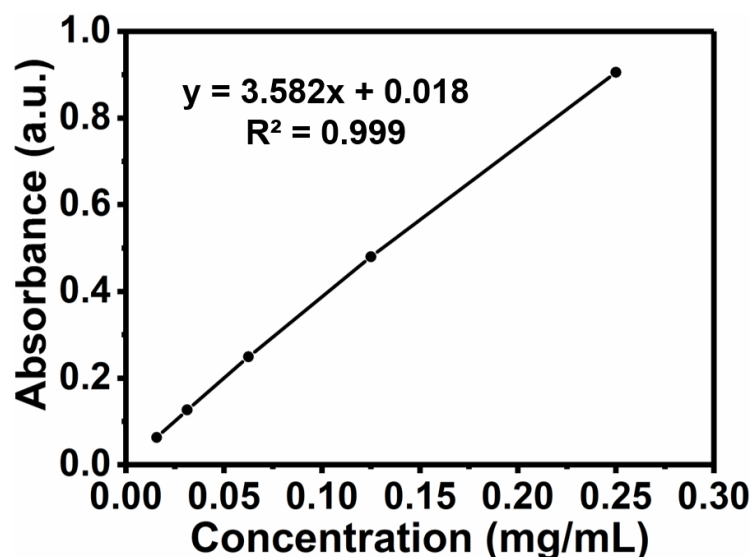

**Figure S1.** A calibration curve generated from the standard hydrocaffeic acid solutions at the absorption intensity of 280 nm. The coefficient of determination ( $R^2$ ) was 0.999.

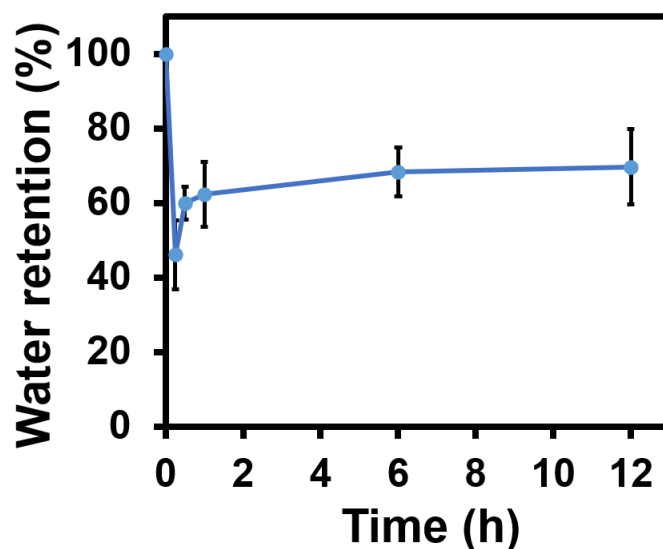

**Figure S2.** Deswelling behavior of the CC hydrogel in culture medium (low-glucose DMEM) at 25 °C. Compared to Figure 7, reswelling occurred after 15 min and the equilibrated water content was about 69.7%.

**Video S1.** Compressibility and fast shape recovery. The CC scaffold (CCs<sub>2</sub> as an example) can endure compression and expel water once being pressed, and can quickly recover to the original shape and take the water back after release of the compression force.
